# Supplementary material
Source: PubMed Central journal article supplement (PMC1859892)

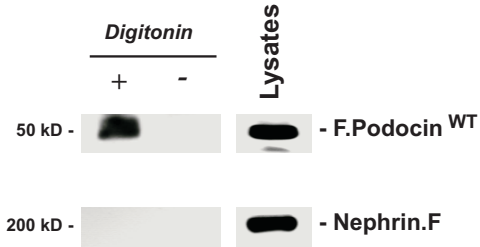

Supplement: pnas_0607465103_1.pdf [file pnas_0607465103_1.pdf]

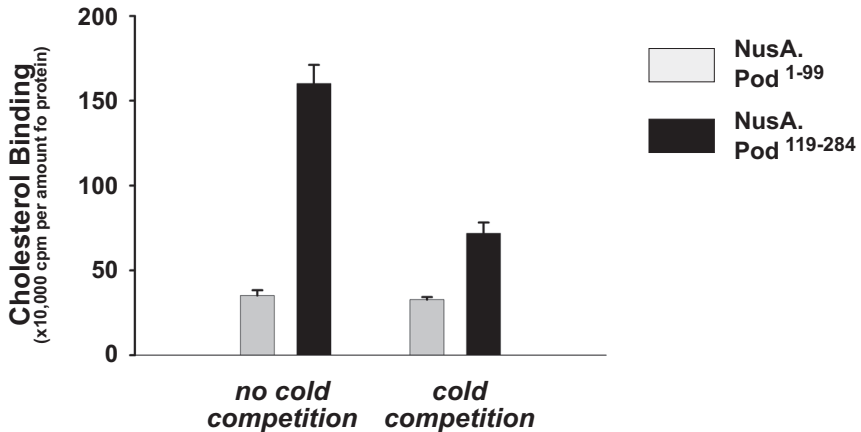

Supplement: pnas_0607465103_2.pdf [file pnas_0607465103_2.pdf]

**a**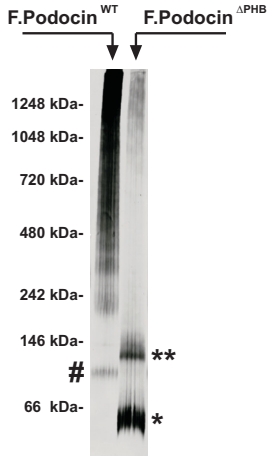**b**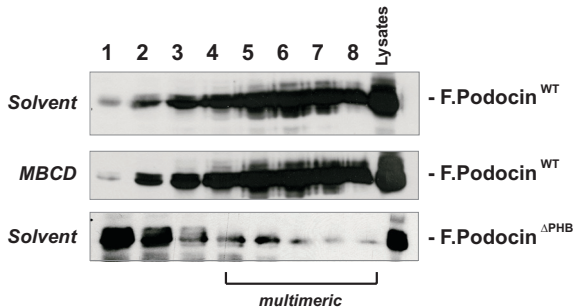

Supplement: pnas_0607465103_3.pdf [file pnas_0607465103_3.pdf]

**a**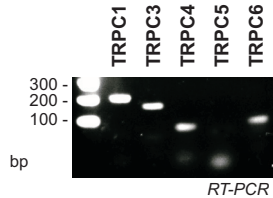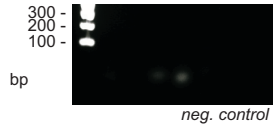**b**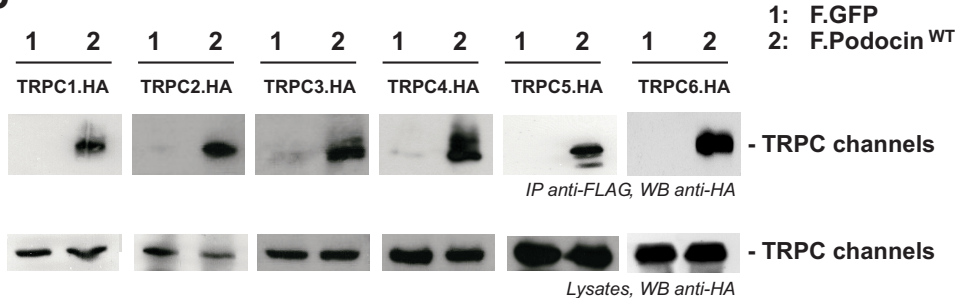

Supplement: pnas_0607465103_4.pdf [file pnas_0607465103_4.pdf]
